# Supplementary material
Source: publisher site journal article supplement (https://www.spandidos-publications.com/3503/downloadSupplementary)

Figure S1. Correlation between mRNA levels of DNA-dependent protein kinase (PRKDC) and programmed cell death ligand 1 (CD274) in lung adenocarcinoma and lung squamous carcinoma according to the data obtained from The Cancer Genome Atlas database. Spearman P-value is presented; log2 stands for binary logarithm. TPM, transcripts per kilobase million.

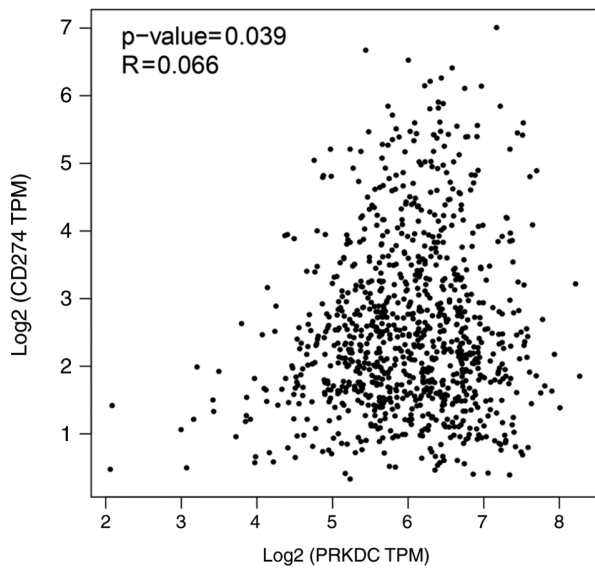

Figure S2. Correlation between mRNA levels of DNA-dependent protein kinase (PRKDC) and programmed cell death protein 1 (PDCD1) in lung adenocarcinoma and lung squamous carcinoma according to the data obtained from The Cancer Genome Atlas database. Spearman P-value is presented. log2 stands for binary logarithm. TPM, transcripts per kilobase million.

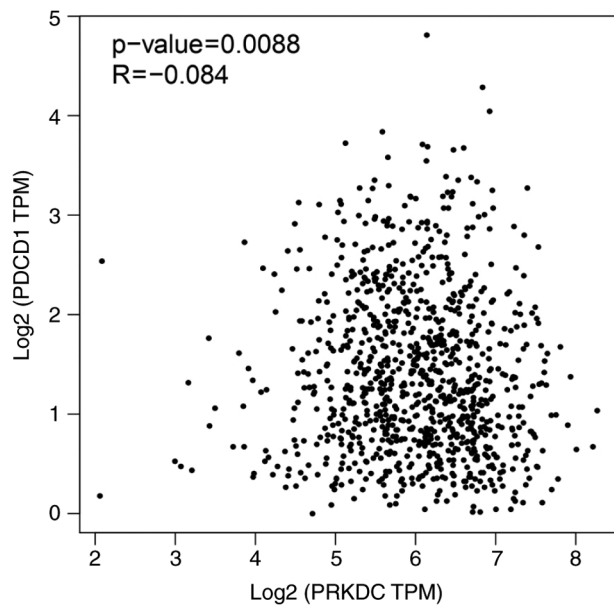

Supplement: Supplementary file 1 [file downloadSupplementary]
